# Supplementary material
Source: PubMed Central journal article supplement (PMC4051497)
Supplement: NIHMS585600-supplement-13361_2014_864_MOESM1_ESM.pdf [file NIHMS585600-supplement-13361_2014_864_MOESM1_ESM.pdf]

Supplemental Information for:

**Effects of Cations on Protein and Peptide Charging in Electrospray Ionization from  
Aqueous Solutions**

Anna C. Susa, Daniel N. Mortensen and Evan R. Williams\*

*Department of Chemistry, University of California, Berkeley, California 94720-1460*

Submitted to the *Journal of the American Society for Mass Spectrometry*

October 28, 2013

\*Address correspondence to Prof. Evan R. Williams:

Department of Chemistry  
University of California, Berkeley  
B42 Hildebrand Hall Berkeley, CA 94720  
Phone: (510) 643-7161  
e-mail: [erw@berkeley.edu](mailto:erw@berkeley.edu)

## Supplemental Table 1

Average number of cation adducts per charge state of each protein/peptide ion.

| <i>protein/peptide</i> | <i>Charge state</i> | <i>Average number of adducts</i> |                       |                      |                       |                                   |                       |                        |                        |
|------------------------|---------------------|----------------------------------|-----------------------|----------------------|-----------------------|-----------------------------------|-----------------------|------------------------|------------------------|
|                        |                     | <i>Li<sup>+</sup></i>            | <i>Na<sup>+</sup></i> | <i>K<sup>+</sup></i> | <i>Rb<sup>+</sup></i> | <i>NH<sub>4</sub><sup>+</sup></i> | <i>Cs<sup>+</sup></i> | <i>TMA<sup>+</sup></i> | <i>TEA<sup>+</sup></i> |
| <b>angiotensin II</b>  | 1+                  | 0.7                              | 0.7                   | 0.7                  | 1.3                   | 0.0                               | 1.0                   | 2.3                    | 2.0                    |
|                        | 2+                  | 4.0                              | 4.0                   | 4.3                  | 4.0                   | 0.0                               | 2.7                   |                        | 0.3                    |
| <b>bradykinin</b>      | 1+                  | 1.0                              | 0.0                   | 0.0                  | 1.0                   | 0.0                               | 2.0                   | 2.0                    | 2.0                    |
|                        | 2+                  | 4.0                              | 4.0                   | 2.0                  | 4.0                   | 0.0                               | 4.0                   | 0.0                    | 0.0                    |
| <b>SubP</b>            | 1+                  |                                  |                       |                      |                       | 0.0                               |                       | 1.0                    | 1.0                    |
|                        | 2+                  | 1.7                              | 2.0                   | 1.7                  | 2.0                   | 0.0                               | 2.0                   | 0.0                    | 0.0                    |
|                        | 3+                  | 1.0                              |                       | 1.0                  | 0.0                   | 0.0                               | 0.0                   | 0.0                    | 0.0                    |
| <b>SubPOMe</b>         | 1+                  | 0.3                              |                       |                      |                       | 0.0                               |                       | 1.0                    | 1.0                    |
|                        | 2+                  | 2.0                              | 3.0                   | 3.0                  | 2.0                   | 0.0                               | 3.0                   | 0.0                    | 0.0                    |
|                        | 3+                  | 0.0                              | 0.0                   | 0.0                  | 0.0                   | 0.0                               | 0.0                   | 0.0                    | 0.0                    |
| <b>SubPOH</b>          | 1+                  |                                  | 0.0                   |                      |                       | 0.0                               | 0.0                   | 2.0                    | 2.0                    |
|                        | 2+                  | 3.0                              | 3.0                   | 3.0                  | 3.0                   | 0.0                               | 2.7                   | 0.0                    | 0.0                    |
|                        | 3+                  |                                  |                       | 0.0                  | 0.0                   | 0.0                               | 0.0                   |                        |                        |
| <b>ubiquitin</b>       | 2+                  |                                  |                       |                      |                       |                                   |                       |                        |                        |
|                        | 3+                  |                                  |                       |                      |                       |                                   |                       | 12.0                   | 5.7                    |
|                        | 4+                  |                                  | 0.7                   |                      | 0.3                   | 0.0                               | 0.7                   | 28.0                   | 11.7                   |
|                        | 5+                  | 5.8                              | 26.7                  | 14.7                 | 9.0                   | 0.0                               | 10.3                  |                        |                        |
|                        | 6+                  | 6.7                              | 1.7                   | 0.3                  |                       | 0.0                               |                       |                        |                        |
| <b>lysozyme</b>        | 3+                  |                                  |                       |                      |                       |                                   |                       |                        | 7.0                    |
|                        | 4+                  |                                  |                       |                      |                       |                                   |                       | 10.0                   | 7.7                    |
|                        | 5+                  |                                  |                       |                      |                       |                                   |                       | 2.0                    |                        |
|                        | 6+                  |                                  | 1.0                   | 5.3                  | 3.0                   | 0.0                               | 3.0                   | 0.0                    |                        |
|                        | 7+                  | 3.7                              | 26.7                  | 7.7                  | 5.7                   | 0.0                               | 5.7                   |                        |                        |
|                        | 8+                  | 1.0                              | 9.3                   | 4.7                  | 4.7                   | 0.0                               | 2.0                   |                        |                        |
|                        | 9+                  | 1.0                              | 2.0                   | 3.0                  | 3.0                   | 0.0                               | 1.0                   |                        |                        |
|                        | 10+                 | 0.0                              |                       |                      |                       |                                   |                       |                        |                        |
| <b>β-lactoglobulin</b> | 4+                  |                                  |                       |                      |                       |                                   |                       |                        | 3.0                    |
|                        | 5+                  |                                  |                       |                      |                       |                                   |                       | 9.0                    | 6.7                    |
|                        | 6+                  | 0.3                              | 20.1                  |                      |                       | 0.0                               |                       | 12.0                   |                        |
|                        | 7+                  | 3.0                              | 20.0                  | 24.7                 | 11.0                  | 0.0                               | 10.0                  |                        |                        |
|                        | 8+                  | 5.0                              | 36.7                  | 35.1                 | 9.7                   | 0.0                               | 5.5                   |                        |                        |
|                        | 9+                  | 0.0                              |                       |                      |                       | 0.0                               | 2.0                   |                        |                        |
|                        | 10+                 | 0.0                              |                       |                      |                       |                                   |                       |                        |                        |

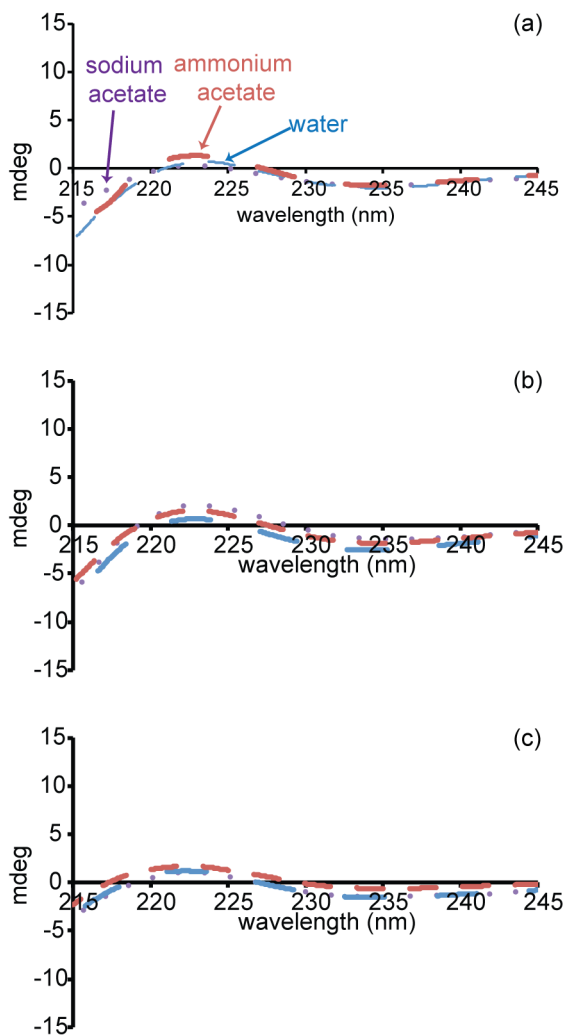

**Supplemental Figure 1**

CD spectra of 50  $\mu$ M (a) SubPOH, (b) SubPNH<sub>2</sub>, and (c) SubPOMe in water (blue dashed line), 25 mM sodium acetate (purple dotted line) and 25 mM ammonium acetate (red dashed line).

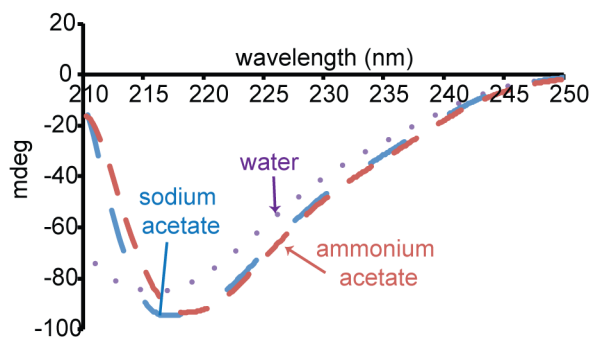

### Supplemental Figure 2

CD spectra of 25  $\mu$ M  $\beta$ -lactoglobulin in water (blue dashed line), 25 mM sodium acetate (purple dotted line) and 25 mM ammonium acetate (red dashed line).

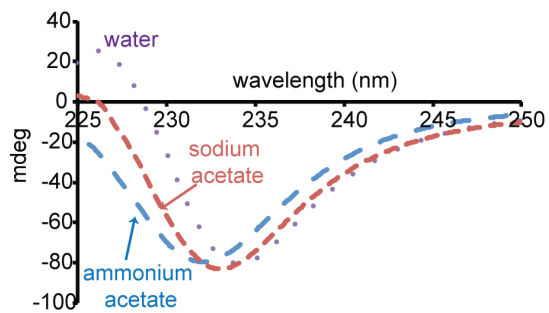

### Supplemental Figure 3

CD spectra of 25  $\mu$ M lysozyme in water (purple dotted line), 25 mM sodium acetate (red dashed line) and 25 mM ammonium acetate (blue dashed line).

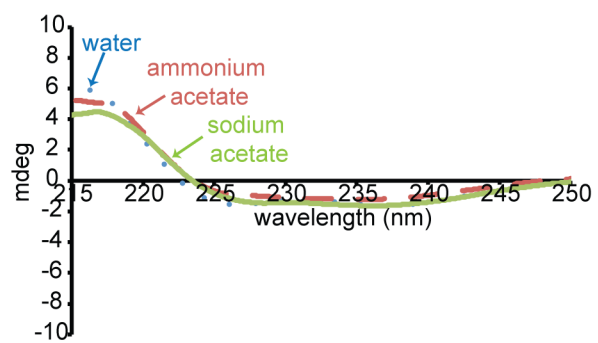

#### Supplemental Figure 4

CD spectra of 25  $\mu$ M angiotensin II in water (blue dotted line), 25 mM ammonium acetate (red dashed line) and 25 mM sodium acetate (green line).
